# Supplementary material for: Mechanism of silica–lysozyme composite formation unravelled by in situ fast SAXS
Source: publisher site journal article supplement (doi:10.3762/bjnano.10.17), 2019-01-14
Supplement: Additional file 1 [file 2190-4286-10-17-S1.pdf]

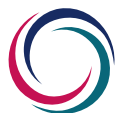

## Supporting Information

for

### **Mechanism of silica–lysozyme composite formation unravelling by in situ fast SAXS**

Tomasz M. Stawski, Daniela B. van den Heuvel, Rogier Besselink, Dominique J. Tobler  
and Liane G. Benning

*Beilstein J. Nanotechnol.* **2019**, *10*, 182–197. [doi:10.3762/bjnano.10.17](https://doi.org/10.3762/bjnano.10.17)

## Additional experimental data

**Table S1:** Selected physicochemical properties of the initial amorphous silica used in the experiments.

---

|                                                                                              |                                                       |
|----------------------------------------------------------------------------------------------|-------------------------------------------------------|
| Molecular mass [g/mol]                                                                       | 60.08                                                 |
| Density [g/cm <sup>3</sup> ]                                                                 | 2.196                                                 |
| Scattering length density, SLD [Å <sup>-2</sup> ]                                            | 1.883·10 <sup>-5</sup>                                |
| ΔSLD with respect to H <sub>2</sub> O [Å <sup>-2</sup> ]                                     | 9.362·10 <sup>-6</sup>                                |
| Solid amount from a 1000 ppm a sodium metasilicate solution at pH 7.5 and T = 21 °C [mmol/L] | 14.85 mmol/L,<br>equivalent to 0.041% volume fraction |

---

**Table S2:** Silica size distribution from fitting.

---

|                             |               |
|-----------------------------|---------------|
| Mean radius [nm]            | 2.525 ± 0.011 |
| Variance [nm <sup>2</sup> ] | 3.707 ± 0.029 |
| Skew                        | 3.976 ± 0.081 |
| Kurtosis                    | 24.80 ± 1.21  |

---

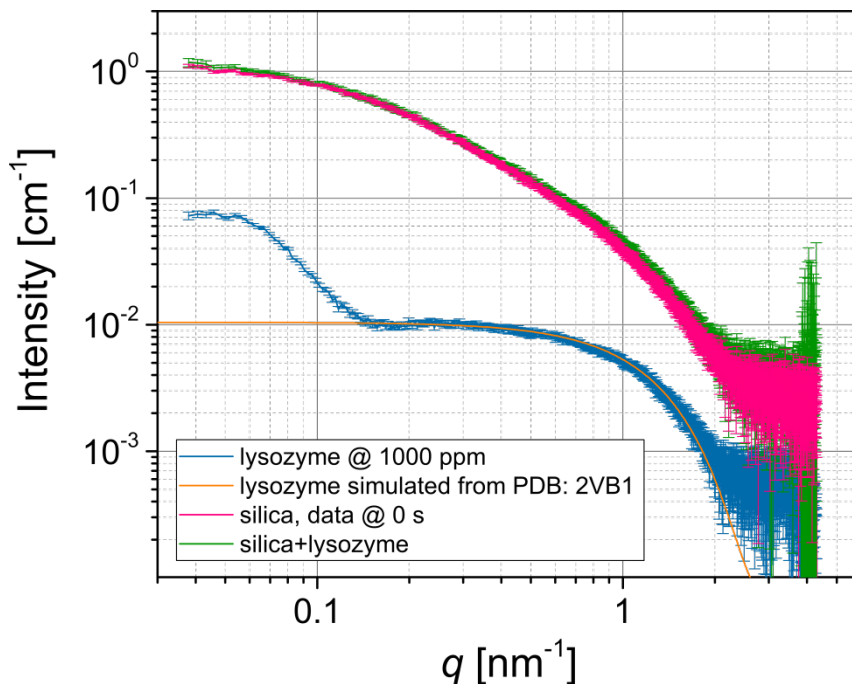

**Figure S1:** Scattering curves of solutions with the initial amorphous silica NPs and the LZM solutions measured independently prior to mixing. The pattern for lysozyme at 1000 ppm (the blue curve) matches well the simulated scattering pattern (the orange curve) generated from the PDB structure file 2VB1, with the exception of  $q < 0.15 \text{ nm}^{-1}$ . The observed low- $q$  intensity increase in the LZM solution originates from a very small population of larger particles/clusters/aggregates and is negligible. In the considered silica–LZM composites, the scattering contrast originating from the lysozyme itself can be mostly disregarded. This can be demonstrated by simply adding together the scattering intensities from the initial silica NP solution @ 0 s (the pink curve) and the LZM solution (the blue curve) and accounting for the uncertainties. The resulting pattern (the green curve) is within the uncertainty indistinguishable from the scattering of the silica NPs solution on its own. This addition corresponds to the hypothetical case when there were no interactions between the silica NPs and the protein, but it also points out that despite relatively high protein concentration (with respect to silica) the resulting scattering intensity of the protein is very low (see also [16] in the main text).
